# Supplementary material
Source: publisher figshare collection journal article supplement (https://acs.figshare.com/ndownloader/files/4687669)
Supplement: Supplementary file 1 [file 4687669]

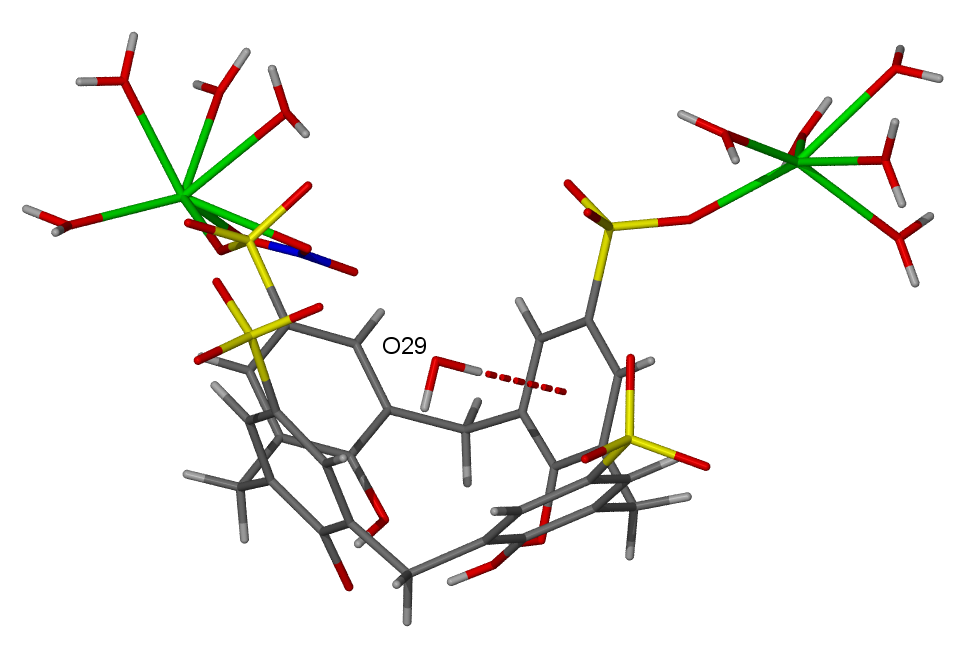


**Figure S1.** Part of the asymmetric unit from the crystal structure of complex **1** displaying both fixed (SO3[4]) and located (water and praseodymium aquo ligands) hydrogen atoms. The OH∙∙∙ interaction between the water molecule (O(29)) hosted in the molecular cavity and an aromatic ring of the SO3[4] molecule is also shown (dashed red line). Selected atoms have been labelled.


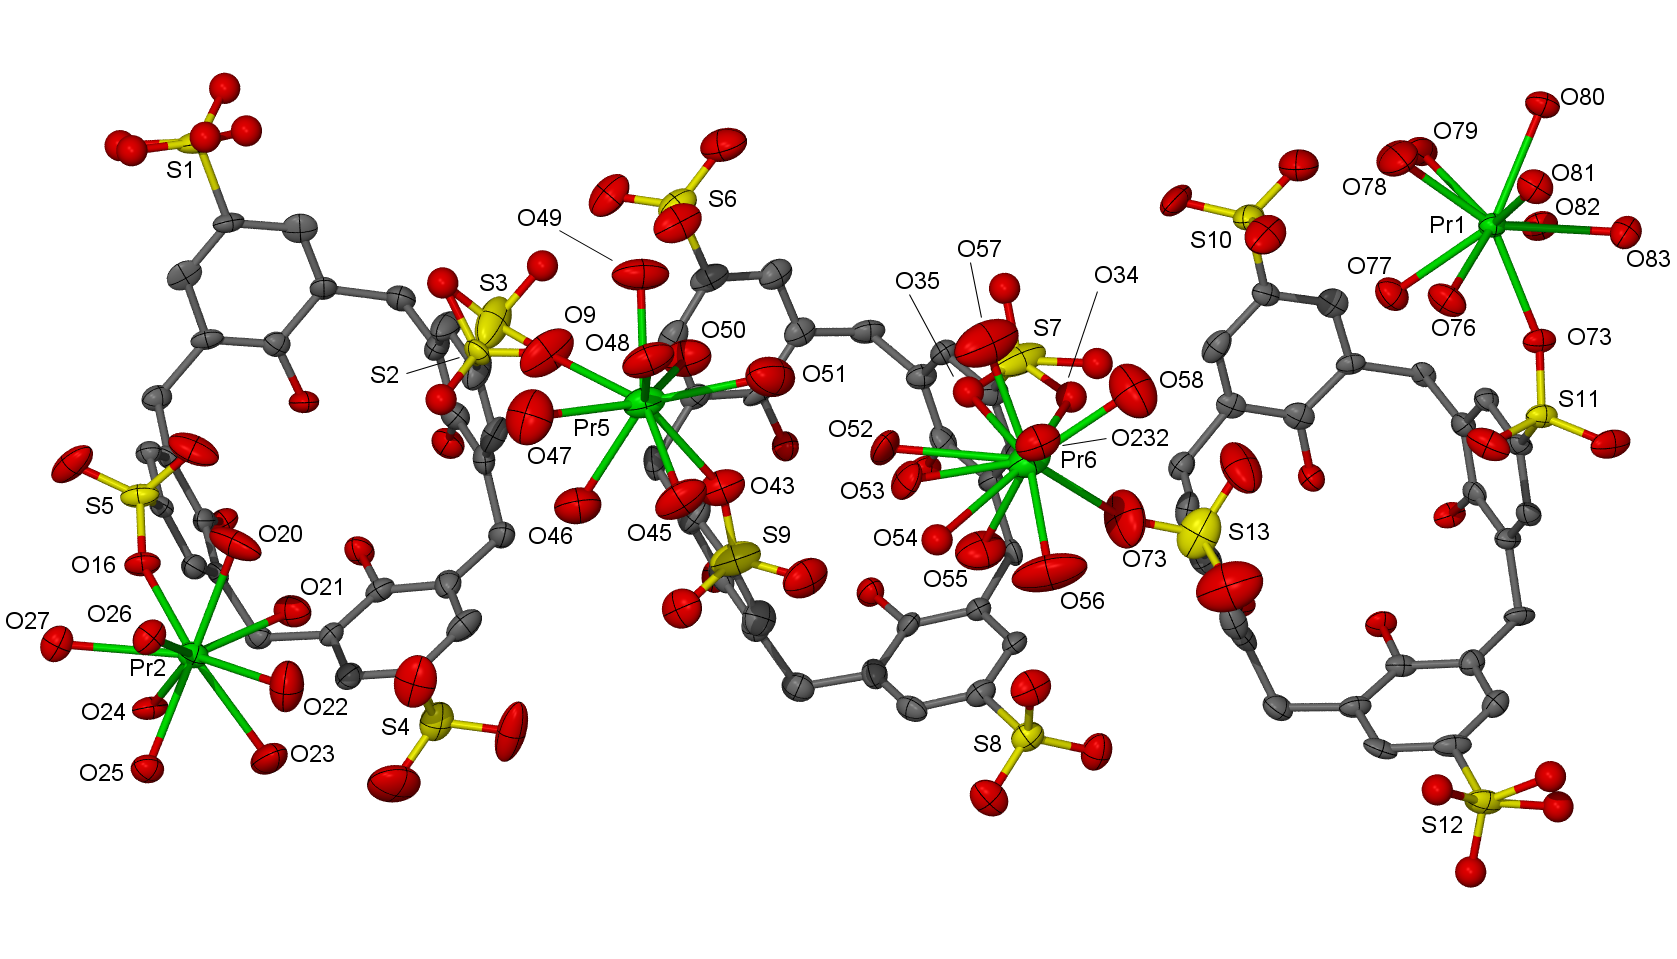


**Figure S2.** Part **A** of the asymmetric unit of the crystal structure of complex **2**, anisotropic displacement ellipsoids shown at the 50% probability level. Some sulfonate oxygen atoms are shown in ball and stick representation and selected atoms have been labelled.


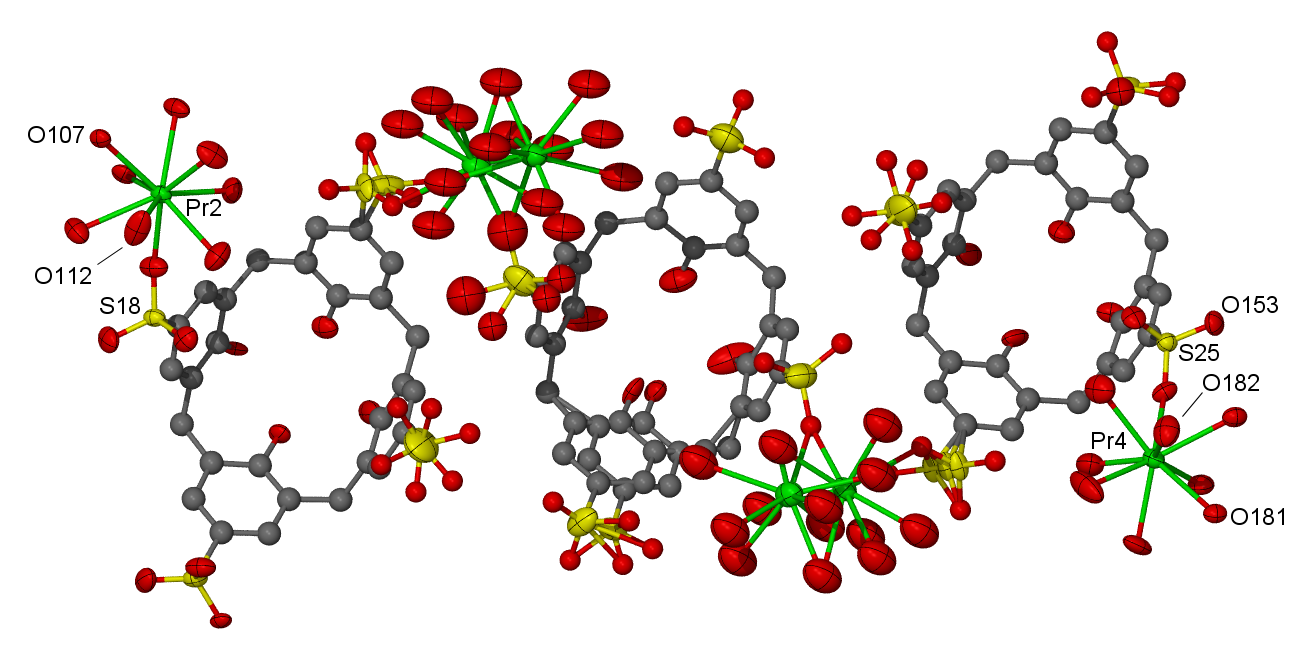


**Figure S3.** Part **B** of the asymmetric unit of the crystal structure of complex **2**, anisotropic displacement ellipsoids shown at the 50% probability level. All carbon and some sulfonate oxygen atoms are shown in ball and stick representation. Selected atoms have been labelled.

| Pr(1)-O(2) 2.552(3) | Pr(1)-O(20) 2.504(3) |
| --- | --- |
| Pr(1)-O(21) 2.487(3) | Pr(1)-O(22) 2.506(3) |
| Pr(1)-O(23) 2.527(3) | Pr(1)-O(24) 2.507(4) |
| Pr(1)-O(25) 2.490(3) | Pr(1)-O(26) 2.513(3) |
| Pr(1)-O(27) 2.533(3) | Pr(2)-O(33) 2.536(3) |
| Pr(2)-O(70) 2.561(3) | Pr(2)-O(71) 2.475(3) |
| Pr(2)-O(72) 2.557(3) | Pr(2)-O(73) 2.486(3) |
| Pr(2)-O(74) 2.520(3) | Pr(2)-O(75) 2.576(4) |
| Pr(2)-O(76) 2.470(3) | Pr(2)-O(77) 2.492(4) |
| Pr(3)-O(30) 2.550(5) | Pr(3)-O(58) 2.626(6) |
| Pr(4)-O(29) 2.60(2) |  |
|  |  |
| Na(1)-O(31) 2.521(8) | Na(1)-O(30) 2.604(8) |
| Na(1)-O(61) 2.268(10) | Na(1)-O(58) 2.493(8) |
| Na(1)-O(63) 2.478(7) | Na(1)-O(62) 2.299(8) |
| Cl(1)-O(63) 1.473(5) | Cl(1)-O(64) 1.413(18) |
| Cl(1)-O(65) 1.396(5) | Cl(1)-O(66) 1.549(18) |
| Cl(1)-O(67) 1.410(5) | Cl(1)-O(68) 1.378(16) |
| Cl(1)-O(69) 1.445(4) | Cl(2)-O(78) 1.450(4) |
| Cl(2)-O(79) 1.429(4) | Cl(2)-O(80) 1.430(4) |
| Cl(2)-O(81) 1.428(4) |  |
|  |  |
| Na(1)-O(58)-Pr(3) 107.9(2) | Pr(3)-O(30)-Na(1) 106.9(2) |
| S(5)-O(30)-Na(1) 95.7(3) | S(5)-O(31)-Na(1) 97.5(3) |

**Table S2.** Interatomic distances between selected atoms in the crystal structure of complex **3**. Angles between vectors relating to the sulfonate chelate of the sodium metal centre and the metal bridging water molecules are also listed (distances given in Å and angles given in º with e.s.d. in parentheses).


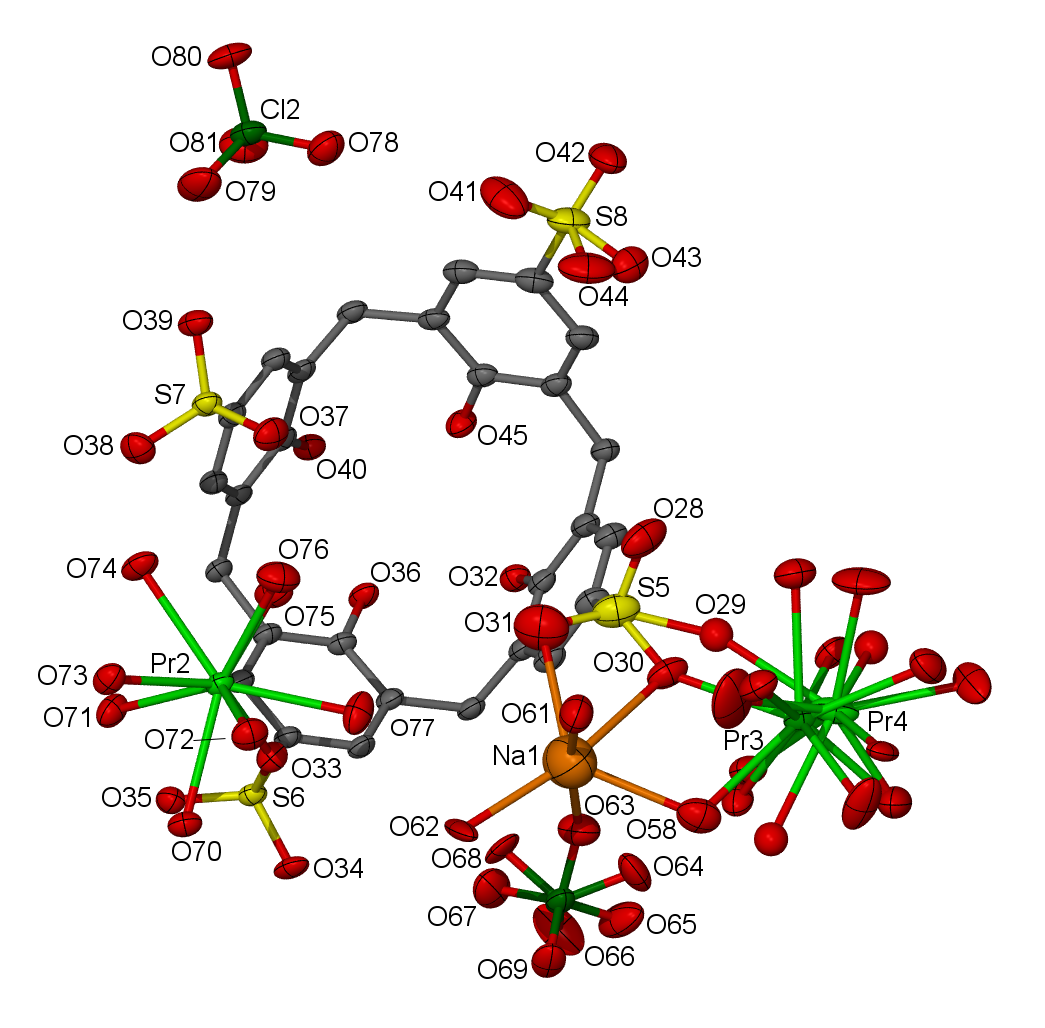


**Figure S4** Part **B** of the asymmetric unit in the crystal structure of complex **3**, anisotropic displacement ellipsoids shown at the 50% probability level. Some disordered praseodymium aquo ligands and one sulfonate oxygen atom are shown in ball and stick representation. Selected atoms have been labelled.
